# Supplementary material for: Donor Pericardial Interleukin and Apolipoprotein Levels May Predict the Outcome after Human Orthotopic Heart Transplantation
Source: MDPI journal article supplement (doi:10.3390/ijms24076780), 2023-04-05
Supplement: s1 [file s1]

## SUPPLEMENTARY TABLES

**Table S1. Relationship between donor risk scores and immune parameters**

|                      | UNOS-D<br>score | HDS     | aHDS    | Median | IQR (25-75)     |
|----------------------|-----------------|---------|---------|--------|-----------------|
|                      | p value         | p value | p value |        |                 |
| thiol (414 nm)       | 0.284           | 0.174   | 0.362   | 0.73   | 0.00 - 3.05     |
| thiol (405 nm)       | 0.541           | 0.520   | 0.353   | 1.32   | 0.00 - 3.66     |
| IFN $\gamma$ (pg/mL) | 0.896           | 0.935   | 0.970   | 2.74   | 1.72 - 3.56     |
| IL-17A (pg/mL)       | 0.004           | 0.000   | 0.009   | 8.56   | 8.49 - 8.72     |
| IL-17F (pg/mL)       | 0.405           | 0.396   | 0.928   | 17.56  | 17.20 - 18.41   |
| IL-21 (pg/mL)        | 0.722           | 0.582   | 0.840   | 27.46  | 19.20 - 37.94   |
| IL-22 (pg/mL)        | 0.722           | 0.654   | 0.862   | 17.11  | 17.09 - 17.13   |
| IL-4 (pg/mL)         | 0.748           | 0.973   | 0.998   | 25.06  | 20.72 - 32.65   |
| TNF (pg/mL)          | 0.374           | 0.427   | 0.568   | 3.22   | 3.14 - 3.48     |
| IL-10 (pg/mL)        | 0.748           | 0.365   | 0.450   | 25.90  | 6.10 - 42.40    |
| IL-13 (pg/mL)        | 0.426           | 0.733   | 0.982   | 5.83   | 5.69 - 6.40     |
| IL-2 (pg/mL)         | 0.549           | 0.518   | 0.287   | 22.81  | 14.78 - 34.51   |
| IL-5 (pg/mL)         | 0.004           | 0.000   | 0.000   | 1.04   | 0.93 - 1.31     |
| IL-6 (pg/mL)         | 0.469           | 0.053   | 0.057   | 111.32 | 31.99 - 390.71  |
| IL-9 (pg/mL)         | 0.818           | 0.840   | 0.494   | 17.39  | 16.83 - 18.75   |
| Leptin (ng/mL)       | 0.014           | 0.653   | 0.061   | 5.14   | 4.58 - 5.39     |
| Adiponectin (ng/mL)  | 0.006           | 0.030   | 0.142   | 16.07  | 12.18 - 23.55   |
| Adipsin (ng/mL)      | 0.963           | 0.303   | 0.553   | 530.14 | 469.19 - 603.05 |
| oxLDL (ng/mL)        | 0.499           | 0.573   | 0.202   | 242.28 | 170.83 - 289.91 |
| ApoAI (ug/mL)        | 0.416           | 0.972   | 0.005   | 51.85  | 41.52 - 94.00   |
| ApoAII (ug/mL)       | 0.109           | 0.973   | 0.030   | 194.83 | 108.36 - 230.30 |
| ApoB100 (ug/mL)      | 0.691           | 0.881   | 0.228   | 105.72 | 50.51 - 219.23  |
| ApoCII (ug/mL)       | 0.329           | 0.568   | 0.022   | 9.28   | 8.40 - 10.06    |
| ApoCIII (ug/mL)      | 0.357           | 0.541   | 0.059   | 5.77   | 1.84 - 17.88    |
| ApoD (ug/mL)         | 0.350           | 0.774   | 0.098   | 6.87   | 4.07 - 11.52    |
| ApoH (ug/mL)         | 0.744           | 0.783   |         | 0.00   | 0.00 - 0.00     |
| ApoJ (ug/mL)         | 0.860           | 0.426   |         | 0.00   | 0.00 - 0.00     |
| ApoM (ug/mL)         | 0.607           | 0.823   | 0.053   | 11.35  | 2.90 - 28.98    |
| T3 (pg/mL)           | 0.121           | 0.756   | 0.312   | 2.00   | 1.10 - 2.62     |
| T4 (ug/dL)           | 0.262           | 0.002   | 0.438   | 3.26   | 2.84 - 3.78     |

*aHDS: adapted Heart Donor Score; Apo: apolipoprotein; HDS: Heart Donor Score; IFN $\gamma$ : interferon- $\gamma$ ; IL: interleukin; IQR: interquartile range; oxLDL: oxidized low-density lipoprotein; T3: triiodothyronine; T4: thyroxine; TNF: tumor necrosis factor; UNOS-D: United Network for Organ Sharing Donor score*

**Table S2. Relationship between donor interleukin levels and primary graft dysfunction**

|                      | NO PGD |                 | PGD    |                 | p value |
|----------------------|--------|-----------------|--------|-----------------|---------|
|                      | Median | IQR (25-75)     | Median | IQR (25-75)     |         |
| thiol (414 nm)       | 0.80   | 0.00 - 3.18     | 0.65   | 0.00 - 6.56     | 0.964   |
| thiol (405 nm)       | 1.60   | 0.00 - 3.69     | 0.52   | 0.00 - 6.22     | 0.688   |
| IFN $\gamma$ (pg/mL) | 2.30   | 1.51 - 5.94     | 3.23   | 2.60 - 3.47     | 0.238   |
| IL-17A (pg/mL)       | 8.59   | 8.49 - 8.83     | 8.54   | 8.51 - 8.63     | 0.485   |
| IL-17F (pg/mL)       | 17.56  | 17.17 - 24.15   | 17.83  | 17.21 - 18.24   | 0.965   |
| IL-21 (pg/mL)        | 32.25  | 20.39 - 38.72   | 19.74  | 17.31 - 53.94   | 0.206   |
| IL-22 (pg/mL)        | 17.11  | 17.08 - 17.13   | 17.13  | 17.09 - 17.19   | 0.590   |
| IL-4 (pg/mL)         | 25.93  | 20.72 - 44.16   | 20.72  | 18.11 - 25.93   | 0.148   |
| TNF (pg/mL)          | 3.21   | 3.07 - 3.60     | 3.30   | 3.19 - 3.40     | 0.631   |
| IL-10 (pg/mL)        | 32.50  | 6.10 - 45.70    | 19.30  | 6.10 - 45.70    | 0.591   |
| IL-13 (pg/mL)        | 5.76   | 5.68 - 6.93     | 5.91   | 5.76 - 6.19     | 0.727   |
| IL-2 (pg/mL)         | 20.13  | 13.44 - 40.20   | 24.14  | 18.79 - 30.16   | 0.662   |
| IL-5 (pg/mL)         | 1.05   | 0.94 - 1.40     | 1.02   | 0.89 - 1.14     | 0.221   |
| IL-9 (pg/mL)         | 17.45  | 16.90 - 18.90   | 16.90  | 16.77 - 179.06  | 0.359   |
| Leptin (ng/mL)       | 5.17   | 4.43 - 5.37     | 4.83   | 4.72 - 8.88     | 0.359   |
| Adiponectin (ng/mL)  | 16.45  | 12.13 - 25.57   | 13.10  | 10.86 - 20.18   | 0.359   |
| Adipsin (ng/mL)      | 541.85 | 468.63 - 603.61 | 522.54 | 461.78 - 582.13 | 0.631   |
| oxLDL (ng/mL)        | 242.28 | 185.12 - 308.96 | 194.65 | 123.20 - 261.33 | 0.203   |
| ApoAI (ug/mL)        | 57.23  | 43.96 - 99.21   | 44.87  | 22.74 - 84.12   | 0.407   |
| ApoAII (ug/mL)       | 206.93 | 113.07 - 254.22 | 163.54 | 74.88 - 204.34  | 0.206   |
| ApoB100 (ug/mL)      | 106.45 | 52.09 - 231.25  | 65.01  | 48.49 - 182.38  | 0.570   |
| ApoCII (ug/mL)       | 9.41   | 8.42 - 16.42    | 8.90   | 8.22 - 9.42     | 0.176   |
| ApoCIII (ug/mL)      | 7.84   | 3.32 - 33.35    | 2.30   | 1.56 - 7.04     | 0.176   |
| ApoD (ug/mL)         | 6.94   | 3.98 - 19.22    | 5.56   | 4.05 - 9.69     | 0.570   |
| ApoH (ug/mL)         | 0.00   | 0.00 - 0.00     | 0.00   | 0.00 - 0.00     | 0.292   |
| ApoJ (ug/mL)         | 0.00   | 0.00 - 0.00     | 0.00   | 0.00 - 0.00     | 0.564   |
| ApoM (ug/mL)         | 17.91  | 7.01 - 34.07    | 8.58   | 0.00 - 11.35    | 0.105   |
| T3 (pg/mL)           | 2.00   | 0.53 - 2.83     | 2.06   | 1.32 - 2.49     | 0.920   |
| T4 (ug/dL)           | 2.95   | 2.57 - 3.78     | 3.52   | 3.25 - 6.36     | 0.194   |

*Apo: apolipoprotein; IFN $\gamma$ : interferon- $\gamma$ ; IL: interleukin; IQR: interquartile range; oxLDL: oxidized low-density lipoprotein; PGD: primer graft dysfunction; T3: triiodothyronine; T4: thyroxine; TNF: tumor necrosis factor*

**Table S3. Relationship between donor interleukin levels and postoperative mechanical circulatory support**

|                     | NO MCS |                 | MCS    |                 | p value |
|---------------------|--------|-----------------|--------|-----------------|---------|
|                     | Median | IQR (25-75)     | Median | IQR (25-75)     |         |
| thiol (414 nm)      | 0.40   | 0.00 - 3.30     | 1.38   | 0.00 - 4.77     | 0.665   |
| thiol (405 nm)      | 1.32   | 0.00 - 3.82     | 1.31   | 0.00 - 4.67     | 0.933   |
| IFNg (pg/mL)        | 2.51   | 1.51 - 6.18     | 3.12   | 2.08 - 3.37     | 0.509   |
| IL-17A (pg/mL)      | 8.63   | 8.50 - 8.86     | 8.54   | 8.46 - 8.61     | 0.173   |
| IL-17F (pg/mL)      | 17.52  | 17.10 - 24.47   | 17.69  | 17.28 - 18.14   | 0.967   |
| IL-21 (pg/mL)       | 33.56  | 20.05 - 44.56   | 20.33  | 17.44 - 40.45   | 0.187   |
| IL-22 (pg/mL)       | 17.11  | 17.08 - 17.14   | 17.12  | 17.10 - 17.16   | 0.734   |
| IL-4 (pg/mL)        | 26.79  | 21.59 - 44.16   | 20.72  | 19.42 - 25.06   | 0.082   |
| TNF (pg/mL)         | 3.22   | 3.11 - 3.61     | 3.26   | 3.14 - 3.37     | 0.804   |
| IL-10 (pg/mL)       | 25.90  | 6.10 - 45.70    | 25.90  | 6.10 - 39.10    | 0.767   |
| IL-13 (pg/mL)       | 5.79   | 5.66 - 7.41     | 5.88   | 5.70 - 6.06     | 0.967   |
| IL-2 (pg/mL)        | 21.47  | 14.44 - 40.87   | 23.47  | 14.44 - 27.82   | 0.869   |
| IL-5 (pg/mL)        | 1.16   | 0.96 - 1.45     | 0.97   | 0.87 - 1.09     | 0.069   |
| IL-9 (pg/mL)        | 17.54  | 16.87 - 26.70   | 16.90  | 16.79 - 98.12   | 0.248   |
| Leptin (ng/mL)      | 5.14   | 4.37 - 5.38     | 5.05   | 4.75 - 7.39     | 0.248   |
| Adiponectin (ng/mL) | 16.07  | 11.65 - 26.02   | 15.13  | 11.58 - 19.78   | 0.458   |
| Adipsin (ng/mL)     | 536.49 | 454.35 - 601.93 | 525.85 | 466.32 - 638.93 | 0.805   |
| oxLDL (ng/mL)       | 256.57 | 180.36 - 318.49 | 194.65 | 139.87 - 251.81 | 0.147   |
| ApoAI (ug/mL)       | 58.75  | 43.15 - 104.11  | 51.05  | 25.07 - 78.47   | 0.458   |
| ApoAII (ug/mL)      | 200.16 | 111.50 - 260.50 | 179.91 | 88.21 - 222.86  | 0.509   |
| ApoB100 (ug/mL)     | 112.35 | 43.23 - 263.17  | 74.44  | 49.24 - 144.53  | 0.509   |
| ApoCII (ug/mL)      | 9.41   | 8.38 - 16.56    | 9.03   | 8.31 - 9.76     | 0.364   |
| ApoCIII (ug/mL)     | 9.02   | 2.91 - 41.21    | 4.18   | 1.59 - 7.88     | 0.248   |
| ApoD (ug/mL)        | 6.87   | 3.91 - 19.38    | 6.48   | 4.20 - 9.11     | 0.741   |
| ApoH (ug/mL)        | 0.00   | 0.00 - 0.05     | 0.00   | 0.00 - 0.00     | 0.232   |
| ApoJ (ug/mL)        | 0.00   | 0.00 - 0.00     | 0.00   | 0.00 - 0.00     | 0.513   |
| ApoM (ug/mL)        | 17.70  | 5.64 - 34.49    | 9.64   | 0.00 - 16.52    | 0.282   |
| T3 (pg/mL)          | 2.02   | 0.48 - 2.88     | 1.99   | 1.48 - 2.37     | 0.853   |
| T4 (ug/dL)          | 2.91   | 2.48 - 3.79     | 3.69   | 3.28 - 5.51     | 0.096   |

*Apo: apolipoprotein; IFNg: interferon- $\gamma$ ; IL: interleukin; IQR: interquartile range; MCS: mechanical circulatory support; oxLDL: oxidized low-density lipoprotein; T3: triiodothyronine; T4: thyroxine; TNF: tumor necrosis factor*

**Table S4. Relationship between donor interleukin levels and vasoplegia**

|                      | NO vasoplegia |                 | Vasoplegia |                 | p value |
|----------------------|---------------|-----------------|------------|-----------------|---------|
|                      | Median        | IQR (25-75)     | Median     | IQR (25-75)     |         |
| thiol (414 nm)       | 0.00          | 0.00 - 2.40     | 4.79       | 2.11 - 11.01    | 0.030   |
| thiol (405 nm)       | 0.73          | 0.00 - 3.17     | 6.54       | 2.10 - 10.35    | 0.045   |
| IFN $\gamma$ (pg/mL) | 2.30          | 1.60 - 4.79     | 3.00       | 2.77 - 3.28     | 0.427   |
| IL-17A (pg/mL)       | 8.59          | 8.49 - 8.78     | 8.54       | 8.53 - 8.55     | 0.525   |
| IL-17F (pg/mL)       | 17.56         | 17.32 - 21.23   | 17.17      | 17.08 - 18.44   | 0.491   |
| IL-21 (pg/mL)        | 32.25         | 19.71 - 50.40   | 19.74      | 19.00 - 20.92   | 0.153   |
| IL-22 (pg/mL)        | 17.11         | 17.09 - 17.15   | 17.11      | 17.08 - 17.13   | 0.513   |
| IL-4 (pg/mL)         | 24.19         | 20.72 - 38.95   | 25.93      | 15.51 - 27.66   | 0.559   |
| TNF (pg/mL)          | 3.23          | 3.10 - 3.54     | 3.21       | 3.21 - 3.45     | 0.791   |
| IL-10 (pg/mL)        | 32.50         | 12.70 - 45.70   | 6.10       | 6.10 - 19.30    | 0.082   |
| IL-13 (pg/mL)        | 5.82          | 5.69 - 6.58     | 5.85       | 5.68 - 6.45     | 1.000   |
| IL-2 (pg/mL)         | 24.14         | 14.11 - 37.52   | 20.13      | 14.78 - 22.81   | 0.524   |
| IL-5 (pg/mL)         | 1.05          | 0.94 - 1.36     | 1.01       | 0.87 - 1.02     | 0.204   |
| IL-6 (pg/mL)         | 181.36        | 35.81 - 421.91  | 36.72      | 29.97 - 51.52   | 0.153   |
| IL-9 (pg/mL)         | 17.45         | 16.86 - 34.49   | 16.90      | 16.75 - 17.17   | 0.185   |
| Leptin (ng/mL)       | 5.17          | 4.60 - 5.38     | 4.78       | 4.20 - 5.91     | 0.874   |
| Adiponectin (ng/mL)  | 16.45         | 12.22 - 24.65   | 13.10      | 10.13 - 19.38   | 0.427   |
| Adipsin (ng/mL)      | 541.85        | 474.57 - 615.26 | 470.87     | 411.49 - 522.54 | 0.153   |
| oxLDL (ng/mL)        | 242.28        | 161.30 - 299.44 | 280.39     | 194.65 - 289.91 | 0.559   |
| ApoAI (ug/mL)        | 46.48         | 42.34 - 92.59   | 72.82      | 27.41 - 168.65  | 0.634   |
| ApoAII (ug/mL)       | 196.27        | 109.93 - 226.30 | 163.54     | 48.21 - 339.08  | 0.711   |
| ApoB100 (ug/mL)      | 106.45        | 51.04 - 207.22  | 65.01      | 47.00 - 1242.80 | 0.958   |
| ApoCII (ug/mL)       | 9.41          | 8.34 - 10.02    | 9.15       | 8.39 - 16.42    | 0.958   |
| ApoCIII (ug/mL)      | 6.07          | 2.50 - 16.97    | 2.30       | 1.49 - 33.35    | 0.560   |
| ApoD (ug/mL)         | 6.81          | 3.86 - 9.32     | 11.99      | 4.35 - 24.98    | 0.315   |
| ApoH (ug/mL)         | 0.00          | 0.00 - 0.00     | 0.00       | 0.00 - 17.15    | 0.349   |
| ApoJ (ug/mL)         | 0.00          | 0.00 - 0.00     | 0.00       | 0.00 - 7.35     | 0.017   |
| ApoM (ug/mL)         | 11.99         | 4.27 - 27.84    | 8.58       | 0.00 - 132.20   | 0.832   |
| T3 (pg/mL)           | 1.99          | 0.82 - 2.72     | 2.23       | 1.59 - 2.50     | 0.506   |
| T4 (ug/dL)           | 3.26          | 2.84 - 3.73     | 4.67       | 1.57 - 6.19     | 0.894   |

*Apo: apolipoprotein; IFN $\gamma$ : interferon- $\gamma$ ; IL: interleukin; IQR: interquartile range; oxLDL: oxidized low-density lipoprotein; T3: triiodothyronine; T4: thyroxine; TNF: tumor necrosis factor*

**Table S5. Relationship between donor interleukin levels and rejection**

|                      | NO rejection |                 | Rejection |                 | p value |
|----------------------|--------------|-----------------|-----------|-----------------|---------|
|                      | Median       | IQR (25-75)     | Median    | IQR (25-75)     |         |
| thiol (414 nm)       | 0.65         | 0.00 - 3.18     | 1.69      | 0.00 - 3.74     | 0.819   |
| thiol (405 nm)       | 1.03         | 0.00 - 3.69     | 1.60      | 0.00 - 4.66     | 0.894   |
| IFN $\gamma$ (pg/mL) | 2.81         | 1.51 - 3.65     | 2.72      | 2.00 - 5.31     | 0.896   |
| IL-17A (pg/mL)       | 8.58         | 8.49 - 8.73     | 8.55      | 8.46 - 8.76     | 0.694   |
| IL-17F (pg/mL)       | 17.56        | 17.08 - 18.44   | 17.56     | 17.32 - 21.67   | 0.827   |
| IL-21 (pg/mL)        | 29.64        | 19.74 - 38.72   | 24.94     | 17.98 - 92.99   | 0.631   |
| IL-22 (pg/mL)        | 17.11        | 17.11 - 17.13   | 17.11     | 17.08 - 17.20   | 0.719   |
| IL-4 (pg/mL)         | 24.19        | 18.98 - 33.74   | 25.93     | 21.59 - 39.81   | 0.540   |
| TNF (pg/mL)          | 3.23         | 3.13 - 3.49     | 3.21      | 3.13 - 3.51     | 0.861   |
| IL-10 (pg/mL)        | 19.30        | 6.10 - 32.50    | 32.50     | 12.70 - 45.70   | 0.622   |
| IL-13 (pg/mL)        | 5.85         | 5.68 - 6.45     | 5.76      | 5.69 - 7.43     | 0.896   |
| IL-2 (pg/mL)         | 22.81        | 14.78 - 34.85   | 22.81     | 16.78 - 44.21   | 0.694   |
| IL-5 (pg/mL)         | 1.05         | 0.93 - 1.32     | 1.01      | 0.90 - 1.32     | 0.570   |
| IL-6 (pg/mL)         | 102.68       | 36.72 - 389.06  | 119.95    | 24.08 - 537.55  | 0.861   |
| IL-9 (pg/mL)         | 17.42        | 16.90 - 18.90   | 16.90     | 16.66 - 734.86  | 0.570   |
| Leptin (ng/mL)       | 5.12         | 4.64 - 5.40     | 5.17      | 4.31 - 5.44     | 0.827   |
| Adiponectin (ng/mL)  | 16.45        | 12.40 - 23.73   | 12.13     | 10.18 - 21.37   | 0.315   |
| Adipsin (ng/mL)      | 522.54       | 468.63 - 601.37 | 576.17    | 476.67 - 658.01 | 0.176   |
| oxLDL (ng/mL)        | 242.28       | 166.07 - 289.91 | 194.65    | 166.07 - 299.44 | 0.759   |
| ApoAI (ug/mL)        | 45.48        | 27.41 - 83.50   | 118.81    | 50.60 - 234.40  | 0.061   |
| ApoCII (ug/mL)       | 9.13         | 8.26 - 9.70     | 10.09     | 9.19 - 21.83    | 0.061   |
| ApoCIII (ug/mL)      | 5.21         | 1.62 - 12.56    | 18.80     | 5.79 - 57.93    | 0.074   |
| ApoD (ug/mL)         | 5.57         | 3.98 - 10.13    | 8.51      | 5.93 - 26.05    | 0.150   |
| ApoH (ug/mL)         | 0.00         | 0.00 - 0.00     | 0.00      | 0.00 - 21.94    | 0.058   |
| ApoJ (ug/mL)         | 0.00         | 0.00 - 0.00     | 0.00      | 0.00 - 3.67     | 0.083   |
| T3 (pg/mL)           | 2.01         | 0.96 - 2.67     | 2.00      | 1.10 - 2.88     | 1.000   |
| T4 (ug/dL)           | 3.23         | 2.77 - 3.83     | 3.66      | 2.47 - 3.99     | 0.853   |

*Apo: apolipoprotein; IFN $\gamma$ : interferon- $\gamma$ ; IL: interleukin; IQR: interquartile range; oxLDL: oxidized low-density lipoprotein; T3: triiodothyronine; T4: thyroxine; TNF: tumor necrosis factor*

**Table S6. Effects of desmopressin replacement therapy on interleukin levels**

|                     | NO desmopressin therapy |                 | Desmopressin therapy |                 | p value |
|---------------------|-------------------------|-----------------|----------------------|-----------------|---------|
|                     | Median                  | IQR (25-75)     | Median               | IQR (25-75)     |         |
| thiol (414 nm)      | 1.17                    | 0.00 - 3.30     | 0.40                 | 0.00 - 3.05     | 0.808   |
| thiol (405 nm)      | 1.32                    | 0.13 - 3.32     | 1.41                 | 0.00 - 4.06     | 0.937   |
| IFNg (pg/mL)        | 3.44                    | 1.92 - 7.61     | 2.46                 | 1.56 - 2.95     | 0.143   |
| IL-17A (pg/mL)      | 8.68                    | 8.52 - 8.88     | 8.54                 | 8.48 - 8.64     | 0.143   |
| IL-17F (pg/mL)      | 17.93                   | 17.47 - 26.14   | 17.45                | 17.10 - 18.21   | 0.189   |
| IL-21 (pg/mL)       | 33.56                   | 22.70 - 82.31   | 22.93                | 19.01 - 35.45   | 0.165   |
| IL-22 (pg/mL)       | 17.13                   | 17.09 - 17.23   | 17.11                | 17.09 - 17.13   | 0.249   |
| IL-4 (pg/mL)        | 28.53                   | 21.59 - 48.71   | 23.32                | 19.42 - 27.23   | 0.141   |
| TNF (pg/mL)         | 3.33                    | 3.20 - 3.70     | 3.19                 | 3.08 - 3.41     | 0.122   |
| IL-10 (pg/mL)       | 39.10                   | 9.40 - 55.60    | 19.30                | 6.10 - 32.50    | 0.251   |
| IL-13 (pg/mL)       | 5.92                    | 5.76 - 9.46     | 5.77                 | 5.68 - 6.17     | 0.217   |
| IL-2 (pg/mL)        | 29.50                   | 17.79 - 52.91   | 17.45                | 13.77 - 27.49   | 0.075   |
| IL-5 (pg/mL)        | 1.26                    | 0.97 - 1.54     | 1.02                 | 0.88 - 1.22     | 0.142   |
| IL-6 (pg/mL)        | 182.51                  | 49.48 - 610.69  | 77.10                | 30.08 - 369.45  | 0.375   |
| IL-9 (pg/mL)        | 17.85                   | 17.02 - 270.57  | 17.04                | 16.79 - 17.72   | 0.164   |
| Leptin (ng/mL)      | 5.28                    | 4.91 - 5.65     | 4.72                 | 4.25 - 5.26     | 0.054   |
| Adiponectin (ng/mL) | 18.72                   | 12.20 - 26.91   | 14.99                | 10.74 - 22.12   | 0.487   |
| oxLDL (ng/mL)       | 213.70                  | 106.53 - 292.29 | 256.57               | 194.65 - 289.91 | 0.261   |
| ApoAI (ug/mL)       | 45.18                   | 30.96 - 78.95   | 71.92                | 41.74 - 98.26   | 0.396   |
| ApoAII (ug/mL)      | 194.88                  | 102.86 - 218.29 | 194.83               | 125.69 - 249.24 | 0.877   |
| ApoB100 (ug/mL)     | 105.72                  | 50.61 - 251.37  | 95.28                | 48.27 - 183.18  | 0.787   |
| ApoCII (ug/mL)      | 9.01                    | 8.15 - 18.49    | 9.55                 | 8.58 - 10.06    | 0.355   |
| ApoCIII (ug/mL)     | 5.34                    | 2.15 - 53.67    | 6.95                 | 1.84 - 17.88    | 1.000   |
| ApoD (ug/mL)        | 5.50                    | 3.71 - 16.64    | 7.78                 | 4.65 - 11.52    | 0.396   |
| ApoH (ug/mL)        | 0.00                    | 0.00 - 0.16     | 0.00                 | 0.00 - 0.00     | 0.321   |
| ApoJ (ug/mL)        | 0.00                    | 0.00 - 0.00     | 0.00                 | 0.00 - 0.00     | 0.414   |
| ApoM (ug/mL)        | 9.63                    | 1.75 - 31.20    | 14.31                | 3.29 - 28.98    | 0.699   |
| T3 (pg/mL)          | 2.00                    | 0.52 - 2.45     | 2.12                 | 1.80 - 2.83     | 0.433   |
| T4 (ug/dL)          | 3.28                    | 2.64 - 3.60     | 3.26                 | 2.84 - 4.21     | 0.563   |

*Apo: apolipoprotein; IFNg: interferon- $\gamma$ ; IL: interleukin; IQR: interquartile range; oxLDL: oxidized low-density lipoprotein; T3: triiodothyronine; T4: thyroxine; TNF: tumor necrosis factor*

**Table S7. Effects of glucocorticoid replacement therapy on interleukin levels**

|                      | NO glucocorticoid therapy |                 | Glucocorticoid therapy |                 | p value |
|----------------------|---------------------------|-----------------|------------------------|-----------------|---------|
|                      | Median                    | IQR (25-75)     | Median                 | IQR (25-75)     |         |
| thiol (414 nm)       | 0.32                      | 0.00 - 3.29     | 1.46                   | 0.00 - 3.05     | 0.686   |
| thiol (405 nm)       | 0.78                      | 0.00 - 3.29     | 2.49                   | 0.18 - 4.06     | 0.431   |
| IFN $\gamma$ (pg/mL) | 2.51                      | 1.80 - 3.27     | 2.79                   | 1.56 - 7.37     | 0.589   |
| IL-17A (pg/mL)       | 8.54                      | 8.49 - 8.65     | 8.69                   | 8.44 - 8.91     | 0.354   |
| IL-17F (pg/mL)       | 17.52                     | 17.14 - 18.01   | 17.93                  | 17.20 - 25.10   | 0.418   |
| IL-21 (pg/mL)        | 30.94                     | 18.11 - 37.79   | 25.11                  | 19.36 - 55.46   | 0.817   |
| IL-22 (pg/mL)        | 17.11                     | 17.08 - 17.13   | 17.12                  | 17.11 - 17.18   | 0.404   |
| IL-4 (pg/mL)         | 23.32                     | 19.42 - 27.66   | 29.83                  | 21.59 - 48.71   | 0.163   |
| TNF (pg/mL)          | 3.22                      | 3.14 - 3.34     | 3.35                   | 3.09 - 3.63     | 0.562   |
| IL-10 (pg/mL)        | 19.30                     | 6.10 - 42.40    | 32.50                  | 19.30 - 42.40   | 0.342   |
| IL-13 (pg/mL)        | 5.83                      | 5.70 - 5.99     | 5.98                   | 5.69 - 8.37     | 0.616   |
| IL-2 (pg/mL)         | 22.81                     | 14.78 - 27.49   | 26.82                  | 13.77 - 42.21   | 0.643   |
| IL-5 (pg/mL)         | 1.03                      | 0.93 - 1.21     | 1.27                   | 0.90 - 1.52     | 0.463   |
| IL-6 (pg/mL)         | 127.82                    | 24.75 - 371.09  | 111.32                 | 33.11 - 610.14  | 0.643   |
| IL-9 (pg/mL)         | 17.39                     | 16.83 - 18.75   | 17.17                  | 16.81 - 42.01   | 1.000   |
| Adiponectin (ng/mL)  | 17.91                     | 12.18 - 26.45   | 14.99                  | 10.70 - 21.56   | 0.487   |
| Adipsin (ng/mL)      | 555.32                    | 509.02 - 603.05 | 474.57                 | 380.25 - 620.56 | 0.217   |
| oxLDL (ng/mL)        | 242.28                    | 166.07 - 301.82 | 218.46                 | 170.83 - 289.91 | 0.816   |
| ApoAI (ug/mL)        | 59.65                     | 31.55 - 94.00   | 51.36                  | 41.74 - 144.24  | 1.000   |
| ApoAII (ug/mL)       | 185.37                    | 102.86 - 216.82 | 212.61                 | 129.07 - 317.86 | 0.355   |
| ApoB100 (ug/mL)      | 106.57                    | 53.74 - 219.23  | 68.17                  | 25.52 - 977.89  | 0.728   |
| ApoCII (ug/mL)       | 9.14                      | 8.40 - 10.04    | 9.41                   | 8.47 - 14.81    | 0.643   |
| ApoCIII (ug/mL)      | 5.77                      | 1.79 - 17.24    | 6.53                   | 2.10 - 28.80    | 0.817   |
| ApoD (ug/mL)         | 6.48                      | 3.90 - 11.52    | 6.87                   | 4.37 - 20.77    | 0.758   |
| ApoH (ug/mL)         | 0.00                      | 0.00 - 0.00     | 0.00                   | 0.00 - 12.86    | 0.264   |
| ApoJ (ug/mL)         | 0.00                      | 0.00 - 0.00     | 0.00                   | 0.00 - 0.00     | 0.221   |
| ApoM (ug/mL)         | 9.64                      | 1.75 - 23.65    | 18.27                  | 3.76 - 106.68   | 0.296   |
| T3 (pg/mL)           | 1.99                      | 0.33 - 2.62     | 2.17                   | 1.89 - 2.77     | 0.364   |
| T4 (ug/dL)           | 3.21                      | 2.85 - 3.69     | 3.46                   | 2.37 - 4.14     | 0.804   |

*Apo: apolipoprotein; IFN $\gamma$ : interferon- $\gamma$ ; IL: interleukin; IQR: interquartile range; oxLDL: oxidized low-density lipoprotein; T3: triiodothyronine; T4: thyroxine; TNF: tumor necrosis factor*

**Table S8. Effects of L-Thyroxine replacement therapy on interleukin levels**

|                      | NO L-thyroxine therapy |                 | L-thyroxine therapy |                 | p value |
|----------------------|------------------------|-----------------|---------------------|-----------------|---------|
|                      | Median                 | IQR (25-75)     | Median              | IQR (25-75)     |         |
| thiol (414 nm)       | 0.32                   | 0.00 - 3.30     | 1.46                | 0.00 - 3.21     | 0.665   |
| thiol (405 nm)       | 0.78                   | 0.00 - 3.59     | 2.49                | 0.54 - 4.80     | 0.312   |
| IFN $\gamma$ (pg/mL) | 2.51                   | 1.72 - 3.37     | 2.79                | 1.65 - 7.52     | 0.650   |
| IL-17A (pg/mL)       | 8.54                   | 8.49 - 8.68     | 8.69                | 8.51 - 8.94     | 0.248   |
| IL-17F (pg/mL)       | 17.52                  | 17.03 - 18.14   | 17.93               | 17.27 - 24.77   | 0.386   |
| IL-21 (pg/mL)        | 30.94                  | 19.20 - 46.13   | 22.67               | 19.02 - 42.22   | 0.621   |
| IL-22 (pg/mL)        | 17.11                  | 17.08 - 17.14   | 17.12               | 17.10 - 17.15   | 0.799   |
| IL-4 (pg/mL)         | 24.19                  | 20.28 - 28.10   | 29.83               | 20.07 - 54.57   | 0.385   |
| TNF (pg/mL)          | 3.22                   | 3.11 - 3.37     | 3.35                | 3.14 - 3.61     | 0.620   |
| IL-10 (pg/mL)        | 25.90                  | 6.10 - 45.70    | 25.90               | 16.00 - 72.10   | 0.767   |
| IL-13 (pg/mL)        | 5.83                   | 5.66 - 6.12     | 5.98                | 5.70 - 7.93     | 0.592   |
| IL-2 (pg/mL)         | 22.81                  | 14.44 - 29.83   | 26.82               | 14.44 - 40.87   | 0.649   |
| IL-5 (pg/mL)         | 1.03                   | 0.93 - 1.29     | 1.27                | 0.97 - 1.51     | 0.343   |
| IL-6 (pg/mL)         | 142.02                 | 32.73 - 406.58  | 80.58               | 30.30 - 542.25  | 0.934   |
| IL-9 (pg/mL)         | 17.43                  | 16.88 - 29.03   | 16.90               | 16.77 - 25.83   | 0.364   |
| Leptin (ng/mL)       | 5.19                   | 4.75 - 5.62     | 4.60                | 4.19 - 5.16     | 0.058   |
| Adiponectin (ng/mL)  | 17.91                  | 12.26 - 26.02   | 14.05               | 10.04 - 18.63   | 0.248   |
| Adipsin (ng/mL)      | 555.32                 | 496.11 - 609.43 | 474.57              | 395.40 - 560.94 | 0.161   |
| oxLDL (ng/mL)        | 242.28                 | 163.69 - 287.53 | 266.10              | 158.92 - 339.93 | 0.562   |
| ApoAI (ug/mL)        | 71.92                  | 39.82 - 96.36   | 45.15               | 33.44 - 85.09   | 0.364   |
| ApoAII (ug/mL)       | 194.83                 | 105.48 - 222.30 | 197.68              | 86.26 - 275.43  | 0.934   |
| ApoB100 (ug/mL)      | 112.47                 | 61.25 - 237.96  | 52.28               | 12.49 - 373.60  | 0.149   |
| ApoCII (ug/mL)       | 9.28                   | 8.41 - 11.81    | 9.26                | 8.21 - 11.57    | 0.741   |
| ApoCIII (ug/mL)      | 7.04                   | 2.13 - 30.29    | 4.27                | 1.48 - 14.22    | 0.364   |
| ApoD (ug/mL)         | 7.10                   | 4.20 - 13.80    | 6.25                | 3.72 - 12.36    | 0.680   |
| ApoH (ug/mL)         | 0.00                   | 0.00 - 0.00     | 0.00                | 0.00 - 4.29     | 0.894   |
| ApoJ (ug/mL)         | 0.00                   | 0.00 - 0.00     | 0.00                | 0.00 - 1.84     | 0.127   |
| ApoM (ug/mL)         | 11.35                  | 5.26 - 27.69    | 13.96               | 1.15 - 55.64    | 0.967   |
| T4 (ug/dL)           | 3.21                   | 2.71 - 3.67     | 3.52                | 2.66 - 4.46     | 0.539   |

*Apo: apolipoprotein; IFN $\gamma$ : interferon- $\gamma$ ; IL: interleukin; IQR: interquartile range; oxLDL: oxidized low-density lipoprotein; T3: triiodothyronine; T4: thyroxine; TNF: tumor necrosis factor*



**Table S9. Correlations with preexplantation laboratory parameters (1)**

|                 | INR    |         |    | RBC (T/L) |         |    | HCT (%) |         |    |
|-----------------|--------|---------|----|-----------|---------|----|---------|---------|----|
|                 | $\rho$ | p value | N  | $\rho$    | p value | N  | $\rho$  | p value | N  |
| IL-22 (pg/mL)   | .485*  | 0.030   | 20 | -.555*    | 0.026   | 16 | -.525*  | 0.030   | 17 |
| IL-10 (pg/mL)   |        |         |    | -.583*    | 0.018   | 16 | -.532*  | 0.028   | 17 |
| IL-21 (pg/mL)   |        |         |    | -.504*    | 0.046   | 16 | -.483*  | 0.050   | 17 |
| IL-9 (pg/mL)    |        |         |    | -.545*    | 0.029   | 16 | -.519*  | 0.033   | 17 |
| Adipsin (ng/mL) |        |         |    |           |         |    | -.486*  | 0.048   | 17 |

  

|               | ALT (UI/L) |         |    | AST (UI/L) |         |    |
|---------------|------------|---------|----|------------|---------|----|
|               | $\rho$     | p value | N  | $\rho$     | p value | N  |
| IL-22 (pg/mL) | .578**     | 0.010   | 19 | .521*      | 0.022   | 19 |
| IL-10 (pg/mL) | .513*      | 0.025   | 19 | .587**     | 0.008   | 19 |
| IL-13 (pg/mL) | .461*      | 0.047   | 19 |            |         |    |
| IL-2 (pg/mL)  | .542*      | 0.017   | 19 |            |         |    |
| IFNg (pg/mL)  | .478*      | 0.038   | 19 |            |         |    |

  

|                | ALP (UI/L) |         |    |
|----------------|------------|---------|----|
|                | $\rho$     | p value | N  |
| ApoAII (ug/mL) | -.588*     | 0.013   | 17 |
| ApoM (ug/mL)   | -.572*     | 0.016   | 17 |

  

|                | HGB (g/L) |         |    |
|----------------|-----------|---------|----|
|                | $\rho$    | p value | N  |
| IL-17F (pg/mL) | .467*     | 0.038   | 20 |
| IL-4 (pg/mL)   | .593**    | 0.006   | 20 |
| ApoAII (ug/mL) | .456*     | 0.043   | 20 |

*ALP: alkaline phosphatase; ALT: alanine transaminase; Apo: apolipoprotein; AST: aspartate aminotransferase; HCT: hematocrit; HGB: hemoglobin; IFN: : interferon- $\gamma$ ; IL: interleukin; INR: international normalized ratio. RBC: red blood cell. \*:  $p < 0.05$ ; \*\*:  $p < 0.01$ .*

**Table S10. Correlations with preexplantation laboratory parameters (2)**

|                     |  | CRP (mg/L)                |         |    |
|---------------------|--|---------------------------|---------|----|
|                     |  | $\rho$                    | p value | N  |
| Leptin (ng/mL)      |  | -.517*                    | 0.020   | 20 |
|                     |  | CKMB (UI/L)               |         |    |
|                     |  | $\rho$                    | p value | N  |
| oxLDL (ng/mL)       |  | -.540*                    | 0.025   | 17 |
|                     |  | PLT (G/L)                 |         |    |
|                     |  | $\rho$                    | p value | N  |
| T3 (pg/mL)          |  | .501*                     | 0.040   | 17 |
|                     |  | Creatinine ( $\mu$ mol/L) |         |    |
|                     |  | $\rho$                    | p value | N  |
| thiol (414 nm)      |  | -.494*                    | 0.027   | 20 |
|                     |  | Sodium (mmol/L)           |         |    |
|                     |  | $\rho$                    | p value | N  |
| Adiponectin (ng/mL) |  | .466*                     | 0.044   | 19 |
|                     |  | Potassium (mmol/L)        |         |    |
|                     |  | $\rho$                    | p value | N  |
| ApoB100 (ug/mL)     |  | .525*                     | 0.021   | 19 |
| ApoH (ug/mL)        |  | .472*                     | 0.041   | 19 |

*Apo: apolipoprotein; CKMB: creatin kinase-MB isoform CRP: C-reactive protein; oxLDL: oxidized low-density lipoprotein; PLT: platelet count; T3: triiodothyronine. \*:  $p < 0.05$ ; \*\*:  $p < 0.01$ .*

**Table S11. Correlations with preexplantation echocardiography parameters**

| TAPSE (cm)                             |         |         |
|----------------------------------------|---------|---------|
| IL-5<br>(pg/mL)                        | ρ       | .975**  |
|                                        | p value | 0.005   |
|                                        | N       | 5       |
| ApoAI<br>(ug/mL)                       | ρ       | -.975** |
|                                        | p value | 0.005   |
|                                        | N       | 5       |
| ApoB100<br>(ug/mL)                     | ρ       | -.947*  |
|                                        | p value | 0.014   |
|                                        | N       | 5       |
| ApoM<br>(ug/mL)                        | ρ       | -.947*  |
|                                        | p value | 0.014   |
|                                        | N       | 5       |
| Left Atrial Horizontal Diameter (cm)   |         |         |
| ApoAII<br>(ug/mL)                      | ρ       | -.644*  |
|                                        | p value | 0.044   |
|                                        | N       | 10      |
| ApoCII<br>(ug/mL)                      | ρ       | -.718*  |
|                                        | p value | 0.019   |
|                                        | N       | 10      |
| ApoM<br>(ug/mL)                        | ρ       | -.702*  |
|                                        | p value | 0.024   |
|                                        | N       | 10      |
| Posterior Wall Diastolic Diameter (cm) |         |         |
| ApoAII<br>(ug/mL)                      | ρ       | -.593*  |
|                                        | p value | 0.033   |
|                                        | N       | 13      |

| Right Ventricular Diastolic Diameter (cm) |         |        |
|-------------------------------------------|---------|--------|
| IFNγ<br>(pg/mL)                           | ρ       | -.735* |
|                                           | p value | 0.038  |
|                                           | N       | 8      |
| IL-17F<br>(pg/mL)                         | ρ       | -.766* |
|                                           | p value | 0.027  |
|                                           | N       | 8      |

| Septum Diastolic Diameter (cm) |         |        |
|--------------------------------|---------|--------|
| TNF<br>(pg/mL)                 | ρ       | -.591* |
|                                | p value | 0.043  |
|                                | N       | 12     |
| IL-13<br>(pg/mL)               | ρ       | -.597* |
|                                | p value | 0.040  |
|                                | N       | 12     |

| LVESD diameter (cm) |         |        |
|---------------------|---------|--------|
| T4<br>(ug/dL)       | ρ       | -.556* |
|                     | p value | 0.021  |
|                     | N       | 17     |

| Left Atrial Longitudinal Diameter (cm) |         |       |
|----------------------------------------|---------|-------|
| thiol<br>(414 nm)                      | ρ       | .750* |
|                                        | p value | 0.013 |
|                                        | N       | 10    |

*Apo: apolipoprotein; IFN $\gamma$ : interferon- $\gamma$ ; IL: interleukin; LVESD: left ventricular end-systolic diameter; T4: thyroxine TAPSE: tricuspid annular plane systolic excursion; TNF: tumor necrosis factor. \*:  $p < 0.05$ ; \*\*:  $p < 0.01$ .*

**Table S12. Correlation between donor age and immune parameters**

|                      | <b>ρ</b> | <b>p</b> |
|----------------------|----------|----------|
| thiol (414 nm)       | 0.192    | 0.417    |
| thiol (405 nm)       | 0.229    | 0.331    |
| IFN $\gamma$ (pg/mL) | -0.059   | 0.806    |
| IL-17A (pg/mL)       | 0.003    | 0.989    |
| IL-17F (pg/mL)       | -0.261   | 0.266    |
| IL-21 (pg/mL)        | 0.067    | 0.778    |
| IL-22 (pg/mL)        | -0.010   | 0.966    |
| IL-4 (pg/mL)         | -,467*   | 0.038    |
| TNF (pg/mL)          | -0.073   | 0.759    |
| IL-10 (pg/mL)        | -0.055   | 0.819    |
| IL-13 (pg/mL)        | -0.114   | 0.633    |
| IL-2 (pg/mL)         | -0.226   | 0.338    |
| IL-5 (pg/mL)         | 0.038    | 0.874    |
| IL-6 (pg/mL)         | -0.057   | 0.812    |
| IL-9 (pg/mL)         | 0.052    | 0.827    |
| Leptin (ng/mL)       | 0.408    | 0.074    |
| Adiponectin (ng/mL)  | 0.282    | 0.229    |
| Adipsin (ng/mL)      | -0.017   | 0.945    |
| oxLDL (ng/mL)        | -0.089   | 0.709    |
| ApoAI (ug/mL)        | -,595**  | 0.006    |
| ApoAII (ug/mL)       | -,613**  | 0.004    |
| ApoB100 (ug/mL)      | -0.409   | 0.073    |
| ApoCII (ug/mL)       | -,525*   | 0.018    |
| ApoCIII (ug/mL)      | -,470*   | 0.037    |
| ApoD (ug/mL)         | -,504*   | 0.023    |
| ApoH (ug/mL)         | -0.367   | 0.112    |
| ApoJ (ug/mL)         | -0.380   | 0.099    |
| ApoM (ug/mL)         | -,674**  | 0.001    |
| T3 (pg/mL)           | -0.055   | 0.824    |
| T4 (ug/dL)           | 0.151    | 0.538    |

*Apo: apolipoprotein; IFN $\gamma$ : interferon- $\gamma$ ; IL: interleukin; oxLDL: oxidized low-density lipoprotein; T3: triiodothyronine; T4: thyroxine; TNF: tumor necrosis factor. \*:  $p < 0.05$ ; \*\*:  $p < 0.01$ .*
